# Supplementary material
Source: PubMed Central journal article supplement (PMC3416067)
Supplement: EC.00007-12_zek999093940so1.pdf [file EC.00007-12_zek999093940so1.pdf]

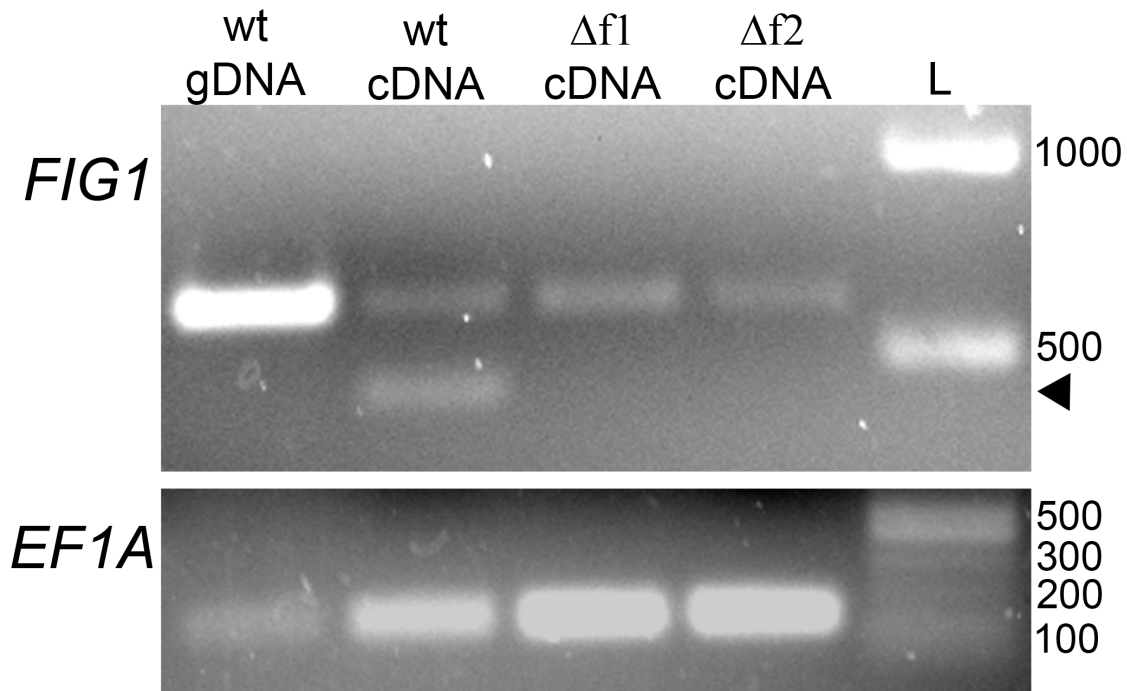

**Supplemental Figure 1.** Amplification of *FIG1* from wt *F. graminearum* genomic DNA (gDNA), wt cDNA,  $\Delta f1$  cDNA, and  $\Delta f2$  cDNA templates. **Top: *FIG1*.** The ~438bp *FIG1* amplicon (arrowhead) is present only in wt cDNA. The ~600 bp band, visible in all samples, is a non-specific amplicon. L = NEB 1 kb DNA Ladder. **Bottom: *EF1A*.** Numbers at right indicate DNA size (kbp). L = NEB 100 bp DNA Ladder.

| Supplemental TABLE 1. Primers used in this study                                                  |                                                   |
|---------------------------------------------------------------------------------------------------|---------------------------------------------------|
| Name                                                                                              | Sequence (5'-3')                                  |
| <b>For replacement of the <i>F. graminearum</i> <i>FIG1</i> locus</b>                             |                                                   |
| Fig1-L5                                                                                           | CGACCTGACTTGACTGACTGACTG                          |
| Fig1-L3-Hyg                                                                                       | GTAGCAACCAGGCGTGGTAGATGTGGTCGACTTTGTTCTCC         |
| Fig1-R5-Hyg                                                                                       | CTTTTACTTTCACCAGCGTTGGCTAACCAGATCTCTCAGGTTTTGTACC |
| Fig1-R3                                                                                           | ACATGAGATAGGGGAACACAATCATGTCC                     |
| Fig1-HygF                                                                                         | GACCACATCTACCACGCCTGGTTGCTACGCCTGAATAAGTG         |
| Fig1-HygR                                                                                         | GAGATCTGGTTAGCCAACGCTGGTGAAAGTAAAAGATGCTGAAGATC   |
| 3' 1/2 HygF                                                                                       | AGTACTTCTACACAGCCATCGGTCCAGACG                    |
| 5' 1/2 HygR                                                                                       | CTGCTGCTTGGTGCACGATAACTTGGTGC                     |
| <b>For <i>F. graminearum</i> RT-PCR</b>                                                           |                                                   |
| Fig1 RT-PCR-F                                                                                     | GTCCAGGTCGGATGGTATCGTTTTGTAC                      |
| Fig1 RT-PCR-R                                                                                     | GGCGAAGATGATGGCAATAATGATGAGATAG                   |
| EF1A-F                                                                                            | AAAGACCCTCCTTGAGGCCATTGA                          |
| EF1A-R                                                                                            | ACTTCAGTGGTGACGTTGGAAGGA                          |
| <b>For complementation of <i>F. graminearum</i> <math>\Delta</math> <i>ig1</i> mutants</b>        |                                                   |
| Fig1-compF                                                                                        | TAGAAGAGCGCTACGTAAGATCGTAGATC                     |
| Fig1-compR                                                                                        | CGTTATTCATGAACCAGTACACGGAGATG                     |
| <b>For probe generation</b>                                                                       |                                                   |
| Cch1 probeF                                                                                       | CTCAATCTCCTGCGAAGTGGAATGAG                        |
| Cch1 probeR                                                                                       | GCAGACAAGGGACTAATAATCGCCAAC                       |
| Mid1 probeF                                                                                       | ACATCGCCTCACTTTGTGATCTACAGTG                      |
| Mid1 probeR                                                                                       | GCTTAGTACGGCTTCGATCTAGCG                          |
| <b>For confirmation of <i>N. crassa</i> <i>ig1</i> and <i>mat A</i> locus presence or absence</b> |                                                   |
| Nc Fig1-F                                                                                         | GTTGGTTTCTTCGGCATCTGCGTTAATC                      |
| Nc Fig1-R                                                                                         | CGATGATCAACAGCGTGAAGCTGAAC                        |
| Nc MAT-A2 F                                                                                       | TGCTATGCTCAACGAGAACGAAGTATCG                      |
| Nc MAT-A2 R                                                                                       | ACTTCTGAGGACCGACTCGGTAAC TG                       |

Supplemental TABLE 2. Fig1 amino acid sequences used in this study

| Species                                        | Length | Source <sup>a</sup>                                                                                                                                                                                                                     |
|------------------------------------------------|--------|-----------------------------------------------------------------------------------------------------------------------------------------------------------------------------------------------------------------------------------------|
| <i>Ashbya gossypii</i>                         | 260    | <i>Ashbya</i> Genome Database, <a href="http://agd.vital-it.ch/index.html">http://agd.vital-it.ch/index.html</a>                                                                                                                        |
| <i>Aspergillus clavatus</i>                    | 268    | <i>Aspergillus</i> Comparative Database, <a href="http://www.broadinstitute.org/annotation/genome/aspergillus_group/MultiHome.html">http://www.broadinstitute.org/annotation/genome/aspergillus_group/MultiHome.html</a>                |
| <i>Aspergillus flavus</i>                      | 268    | <i>Aspergillus</i> Comparative Database                                                                                                                                                                                                 |
| <i>Aspergillus fumigatus</i>                   | 245    | <i>Aspergillus</i> Comparative Database                                                                                                                                                                                                 |
| <i>Aspergillus nidulans</i>                    | 268    | <i>Aspergillus</i> Comparative Database                                                                                                                                                                                                 |
| <i>Aspergillus oryzae</i>                      | 268    | <i>Aspergillus</i> Comparative Database                                                                                                                                                                                                 |
| <i>Aspergillus terreus</i>                     | 268    | <i>Aspergillus</i> Comparative Database                                                                                                                                                                                                 |
| <i>Candida albicans</i>                        |        | <i>Candida</i> Genome Database, <a href="http://www.candidagenome.org/">http://www.candidagenome.org/</a>                                                                                                                               |
| <i>Magnaporthe oryzae</i>                      | 267    | <i>Magnaporthe grisea</i> Database, <a href="http://www.broadinstitute.org/annotation/genome/magnaporthe_grisea/MultiHome.html">http://www.broadinstitute.org/annotation/genome/magnaporthe_grisea/MultiHome.html</a>                   |
| <i>Neosartorya fischeri</i>                    | 268    | <i>Aspergillus</i> Comparative Database                                                                                                                                                                                                 |
| <i>Neurospora crassa</i>                       | 266    | <i>Neurospora crassa</i> Database, <a href="http://www.broadinstitute.org/annotation/genome/neurospora/MultiHome.html">http://www.broadinstitute.org/annotation/genome/neurospora/MultiHome.html</a>                                    |
| <i>Penicillium chrysogenum</i>                 | 268    | Kyoto Encyclopedia of Genes and Genomes, <a href="http://www.kegg.jp/">http://www.kegg.jp/</a>                                                                                                                                          |
| <i>Saccharomyces cerevisiae</i>                | 297    | <i>Saccharomyces</i> Genome Database, <a href="http://www.yeastgenome.org/">http://www.yeastgenome.org/</a>                                                                                                                             |
| <i>Saccharomyces kluyveri</i>                  | 291    | Génolevures, <a href="http://www.genolevures.org">http://www.genolevures.org</a>                                                                                                                                                        |
| <i>Sclerotinia sclerotiorum</i>                | 243    | <i>Sclerotinia sclerotiorum</i> Database, <a href="http://www.broadinstitute.org/annotation/genome/sclerotinia_sclerotiorum/MultiHome.html">http://www.broadinstitute.org/annotation/genome/sclerotinia_sclerotiorum/MultiHome.html</a> |
| <i>Sordaria macrospora</i>                     | 266    | The <i>Sordaria macrospora</i> genome homepage at the Ruhr-University Bochum, <a href="http://c4-1-8.serverhosting.rub.de/public/downloads.html">http://c4-1-8.serverhosting.rub.de/public/downloads.html</a>                           |
| <sup>a</sup> all databases accessed July, 2011 |        |                                                                                                                                                                                                                                         |

SUPPLEMENTARY TABLE 3. Expression of HACS and LACS genes across vegetative growth and sexual development in *F. graminearum*

| Gene designation | Gene name   | RPKM values <sup>a</sup> |         |         |         |         |         |
|------------------|-------------|--------------------------|---------|---------|---------|---------|---------|
|                  |             | vegetative growth        | 24h     | 48h     | 72h     | 96h     | 144h    |
| FGSG_07418       | <i>MIDI</i> | 22.5197                  | 25.4393 | 30.7259 | 17.7237 | 17.6905 | 15.5053 |
| FGSG_01364       | <i>CCHI</i> | 7.85887                  | 4.59464 | 5.59397 | 12.0789 | 14.7028 | 22.8262 |
| FGSG_06302       | <i>FIG1</i> | 125.588                  | 26.691  | 23.3506 | 45.3652 | 58.5581 | 71.2267 |

<sup>a</sup>24h, 48h, 72h, 96h, 144h represent stages of perithecius development following induction of the sexual cycle, as described by Hallen et al (35). 24h: ascogonia; 48: new wall just forming; 72h paraphyses fill the centrum; 96h: asci are immature; 144h: mature asci with spores shooting.
